# Supplementary material for: cjrABC-senB hinders survival of extraintestinal pathogenic E. coli in the bloodstream through triggering complement-mediated killing
Source: PubMed Central journal article supplement (PMC7412671; doi:10.1186/s12929-020-00677-4), 2020-08-06

**a**

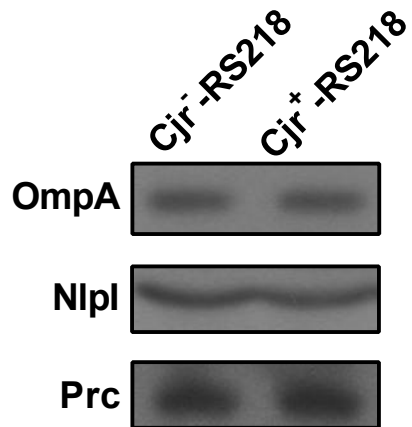

**b**

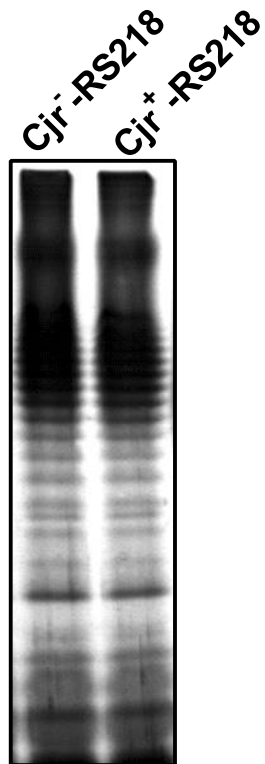

Supplement: 12929_2020_677_MOESM2_ESM.pdf [file 12929_2020_677_MOESM2_ESM.pdf]
